# Supplementary material for: TALEN outperforms Cas9 in editing heterochromatin target sites
Source: PubMed Central journal article supplement (PMC7840734; doi:10.1038/s41467-020-20672-5), 2021-01-27
Supplement: 41467_2020_20672_MOESM1_ESM.pdf [file 41467_2020_20672_MOESM1_ESM.pdf]

# Supplementary Information

## TALEN outperforms Cas9 in editing heterochromatin target sites

Surbhi Jain<sup>1†</sup>, Saurabh Shukla<sup>2,3†</sup>, Che Yang<sup>1</sup>, Meng Zhang<sup>2</sup>, Zia Fatma<sup>2,4</sup>, Manasi Lingamaneni<sup>1</sup>, Shireen Abesteh<sup>1</sup>, Stephan Thomas Lane<sup>4</sup>, Xiong Xiong<sup>2</sup>, Yuchuan Wang<sup>5</sup>, Charles M. Schroeder<sup>2,6,7</sup>, Paul R. Selvin<sup>3,7,8</sup>, Huimin Zhao<sup>1,2,4,7\*</sup>

<sup>1</sup>Department of Biochemistry, School of Molecular and Cellular Biology, University of Illinois at Urbana–Champaign, Urbana, IL

<sup>2</sup>Department of Chemical and Biomolecular Engineering, University of Illinois at Urbana–Champaign, Urbana, IL

<sup>3</sup>Center for the Physics of Living Cells, University of Illinois at Urbana–Champaign, Urbana, IL

<sup>4</sup>Carl R. Woese Institute for Genomic Biology, University of Illinois at Urbana–Champaign, Urbana, IL

<sup>5</sup>Computational Biology Department, School of Computer Science, Carnegie Mellon University, Pittsburgh, PA 15213, USA

<sup>6</sup>Beckman Institute for Advanced Science and Technology, University of Illinois at Urbana-Champaign, Urbana, IL

<sup>7</sup>Center for Biophysics and Quantitative Biology, University of Illinois at Urbana–Champaign, Urbana, IL

<sup>8</sup>Department of Physics, University of Illinois at Urbana–Champaign, Urbana, IL

†These authors contributed equally to this work.

### **This PDF file includes:**

Supplementary Figures 1-9

Supplementary Tables 1-5

30 **Supplementary figures**  
 31

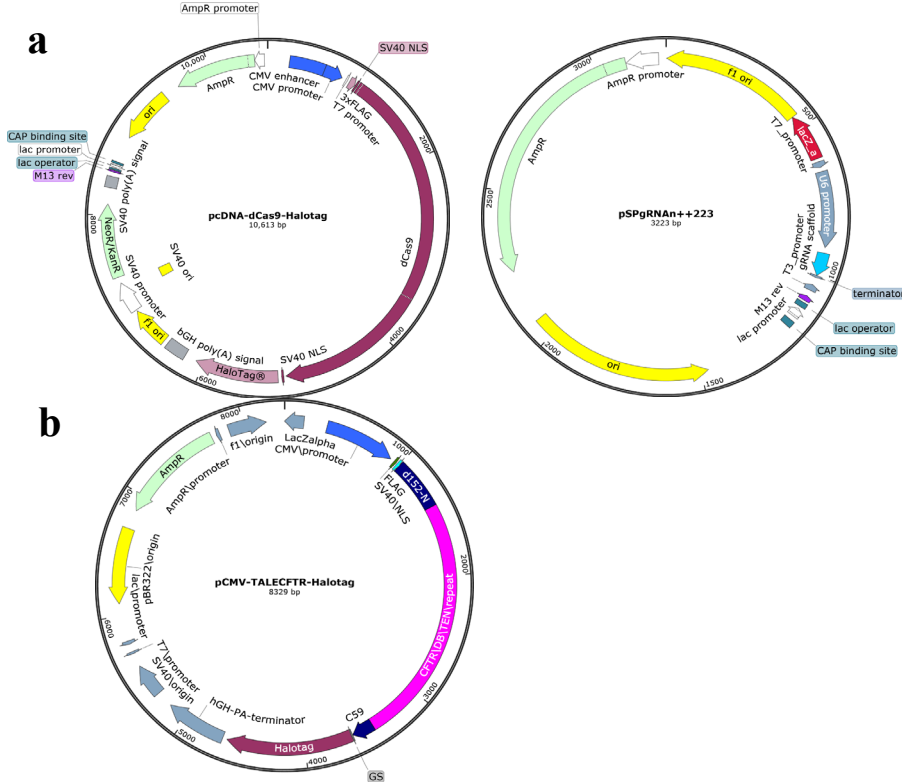

32  
 33  
 34  
 35 **Supplementary Fig. 1. Components of DBD-Halotag plasmid backbones.** **a** dCas9 protein  
 36 variants were constructed by cloning different 20 bp gRNA in pSPgRNA plasmid backbone. **b**  
 37 TALE variants were assembled specifically for each target in a plasmid backbone with optimized  
 38 N- and C-terminal domains. Halotag is genetically fused to dCas9 and TALE at the C-terminal.  
 39  
 40

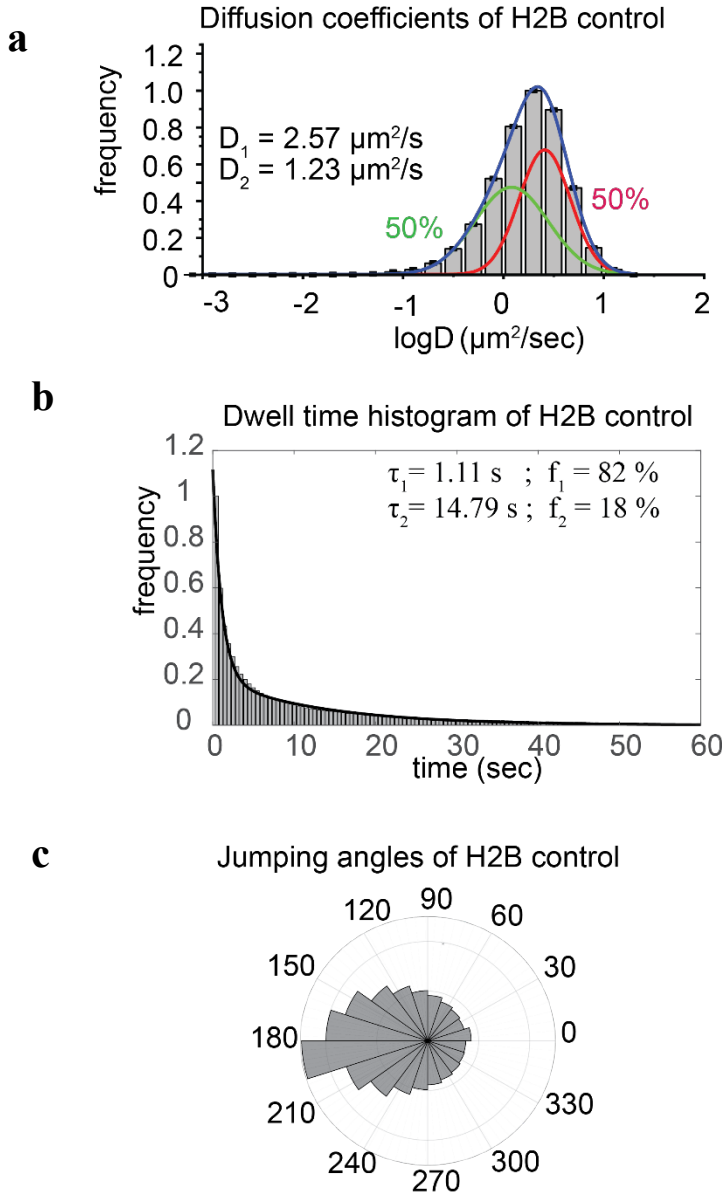

41  
 42  
 43  
 44  
 45  
 46  
 47  
 48  
 49  
 50  
 51  
 52  
 53

**Supplementary Fig. 2. Diffusion characteristics of H2B control.** **a** Diffusion histogram of H2B is also fitted by two peaks that indicate characteristic two modes of diffusion. **b** In long exposure time condition (500 ms), we observe bound H2B molecules. The residence time histogram of H2B is best described by a two-component exponential decay model with a longer binding time of 14.79 seconds and a shorter binding time of 1.11 s. **c** Jumping angles distribution of H2B is highly skewed towards  $180^\circ$  that characterizes highly constricted motion in the genome. Because of the overexpression of H2B molecules, unbound H2B proteins are captured with our short imaging time condition. Therefore, we observe a relatively smaller number of bound H2B condition in this imaging condition that is more prominently observed in the jumping angle plot. The skewness factor for H2B is 2.61. Source data are provided as a Source Data file.

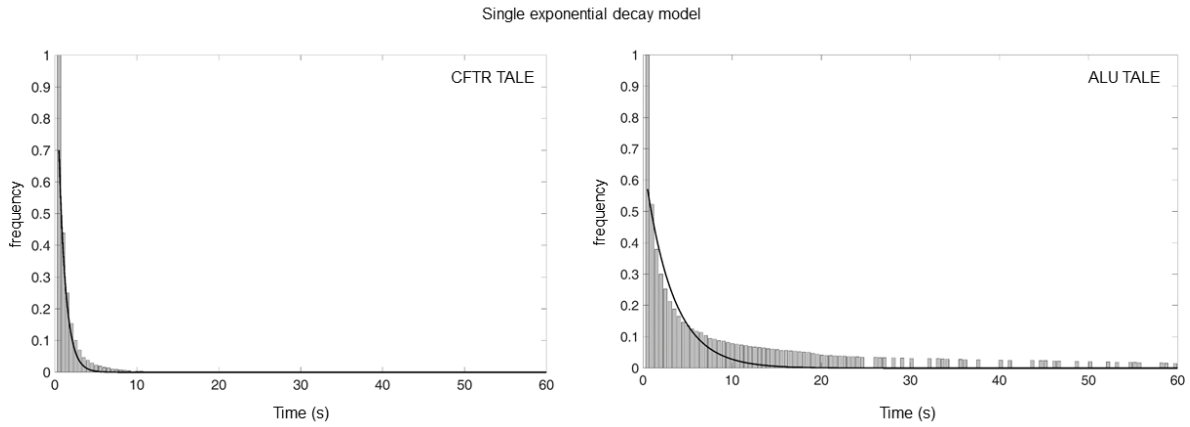

54  
55  
56  
57  
58  
59  
60  
61  
62  
63  
64  
65  
66  
67  
68  
69  
70  
71

**Supplementary Fig. 3. Single exponential decay model fit.** The residence time distribution of CFTR and Alu TALE is fitted with a single component exponential decay model. The model does not fit the data for both CFTR and Alu-TALE. Source data are provided as a Source Data file.

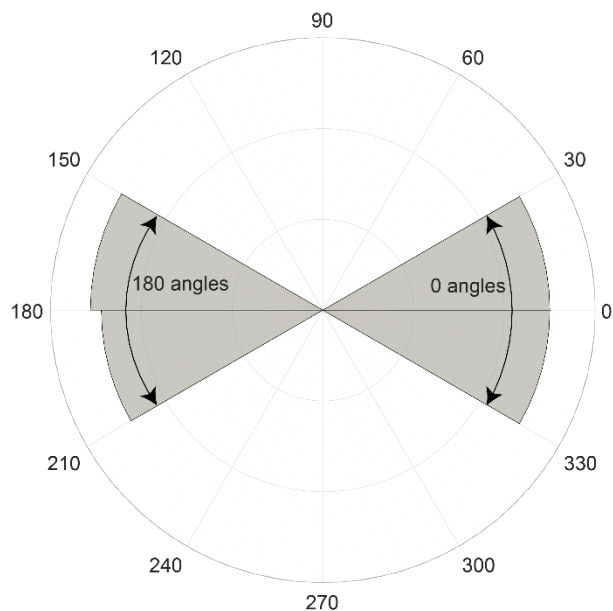

$$\text{Skewness factor} = \frac{0 \text{ angles}}{180 \text{ angles}}$$

72  
 73 **Supplementary Fig. 4. Skewness factor for jumping angle distributions.** Skewness factor is  
 74 defined to quantify the asymmetry of jumping angles of the proteins. Skewness factor is defined  
 75 as the ratio of '0 angles' and '180 angles'. '0 angles' are the angles that are biased towards 0°  
 76 (between -330 ° to 30 °). '180 angles' are the angles that are biased towards 180 ° (angles between  
 77 150 ° to 210 °).  
 78  
 79

80  
81  
82  
83  
84  
85  
86  
87  
88  
89  
90  
91  
92  
93  
94  
95  
96  
97  
98  
99  
100  
101  
102

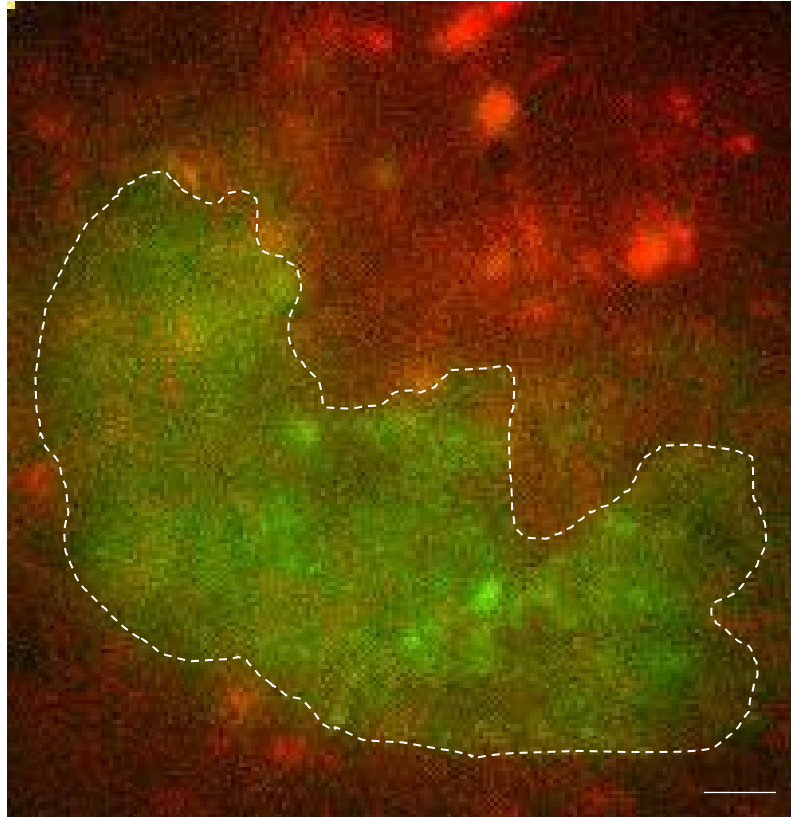

103 **Supplementary Fig. 5. Snapshot from a movie of GFP heterochromatin mask (dotted area).**  
104 HeLa cell stably expressing GFP-HP1a protein. HP1a is known to extensively associate and  
105 stabilize heterochromatin. Heterochromatin acts as a barrier for searching gene-editing proteins.  
106 Red false-color represents Alu TALE molecules, and green false-color represents the  
107 heterochromatin region. Scale bar: 0.1  $\mu\text{m}$

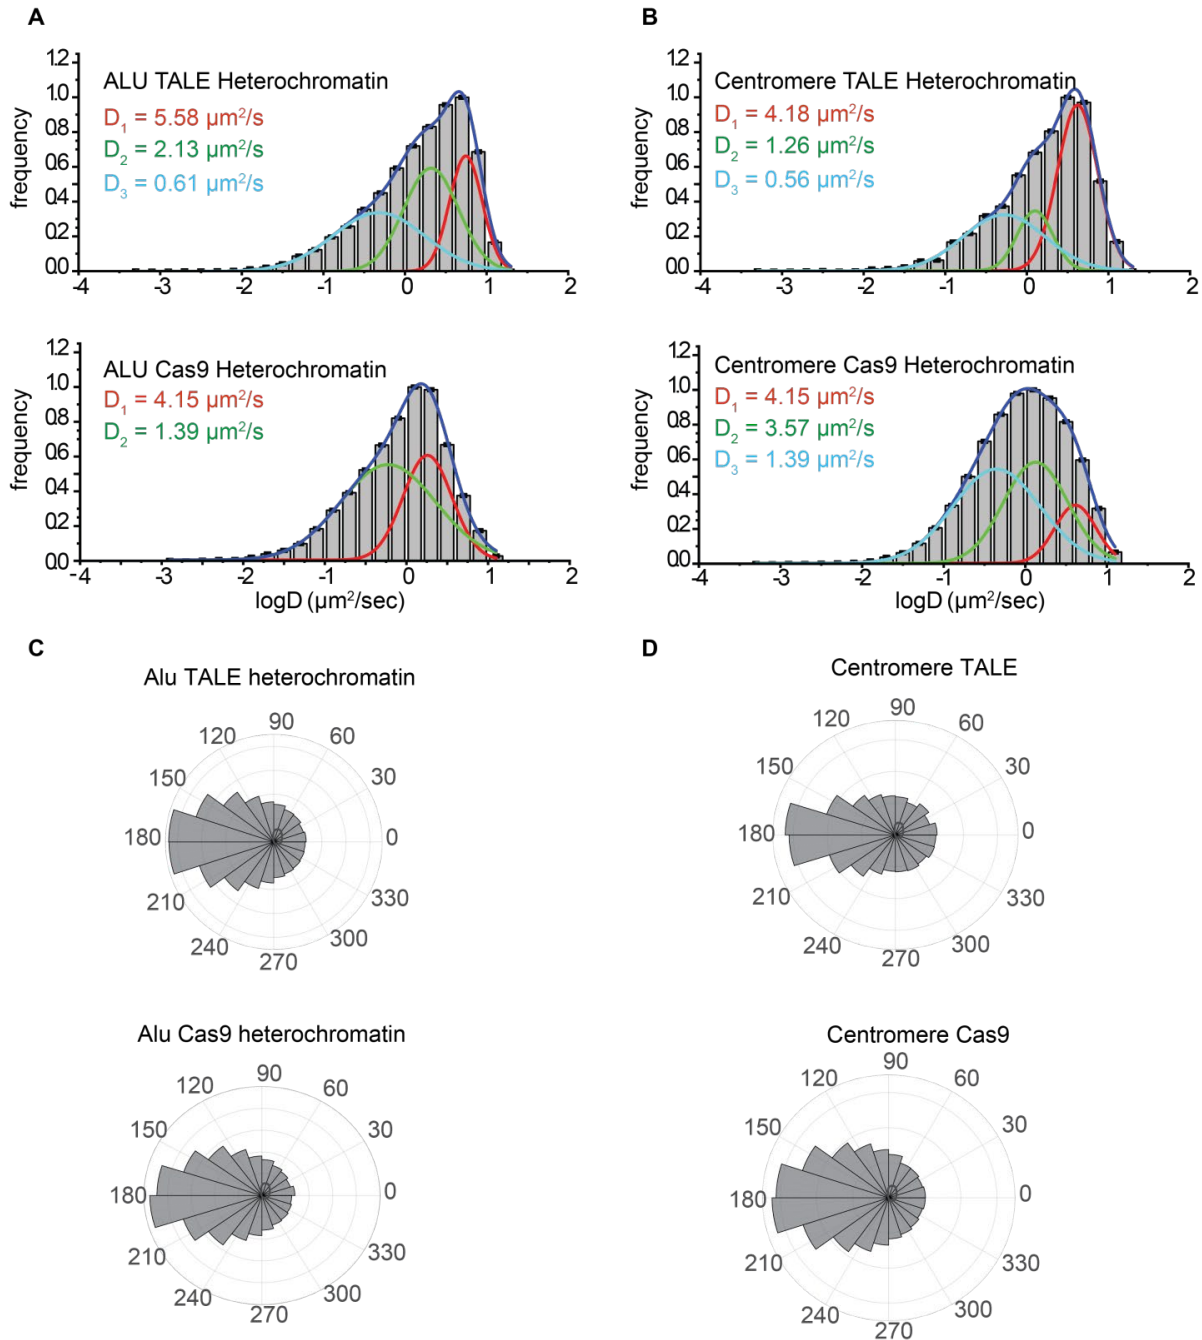

108  
 109

110 **Supplementary Fig. 6. Chromatin context-dependent search of TALE and dCas9 in**  
 111 **heterochromatin.** **a** Histograms of diffusion coefficients of Alu-TALE and Alu-dCas9 in  
 112 heterochromatin region are plotted. ALU-TALE has three distinctly diffusing populations in the  
 113 heterochromatin region as compared to Cas9, that has two subpopulations. **b** In the centromere  
 114 region, both TALE and dCas9 have three distinctly diffusing populations. However, the profile of  
 115 D histograms, i.e., the proportion of each population, is different in TALE and dCas9. The  
 116 intermediate population appears to correspond to hopping behavior as in the case of dCas9; it only  
 117 appears for centromeres, which is a tightly packed heterochromatin feature consisting of tandem  
 118 repetitive sequences. TALE local search process is non-specific and seems to be affected by a high

119 concentration of DNA in a tightly packed space, so we observe hopping behavior for centromere  
120 as well as Alu retrotransposon heterochromatin features that we study. **c**, and **d**, Both TALE and  
121 dCas9 are highly skewed towards -180° in the heterochromatin region. The degree of skewness  
122 varies as the target sequence is varied for both dCas9 and TALE. TALE and dCas9 molecules are  
123 experiencing a densely packed nuclear environment. Alu and Centromere targeting TALEs and  
124 dCas9 variants are used to characterize the search processes in prominent heterochromatin  
125 structural elements of a mammalian genome. In the case of centromeric structures, the target sites  
126 are highly repetitive and concentrated, and we observe a ‘hopping’ like the behavior of TALE and  
127 dCas9 proteins, as shown in Extended Fig. 5. We further show that this hopping behavior depends  
128 on the presence of similar sites in close proximity for target-searching dCas9 molecules. dCas9  
129 targeting Alu retrotransposon elements, which are not concentrated but are interspersed throughout  
130 the genome, do not exhibit hopping behavior, which suggests that the target search process of these  
131 proteins in heterochromatin is fundamentally different. For TALEs, the hopping behavior is  
132 seemingly dependent on the compaction of the chromatin, but for dCas9, there is an additional  
133 requirement, perhaps the increased concentration of PAM sites or a seed-region including PAM-  
134 site. Source data are provided as a Source Data file.



135  
136  
137  
138  
139

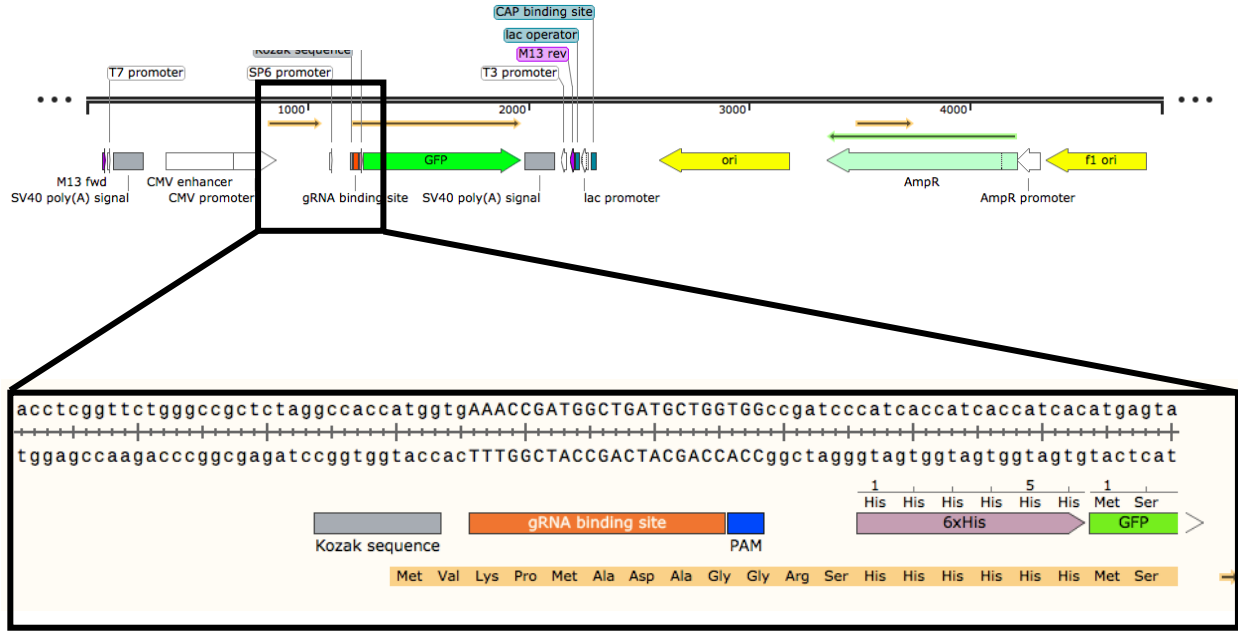

140  
141

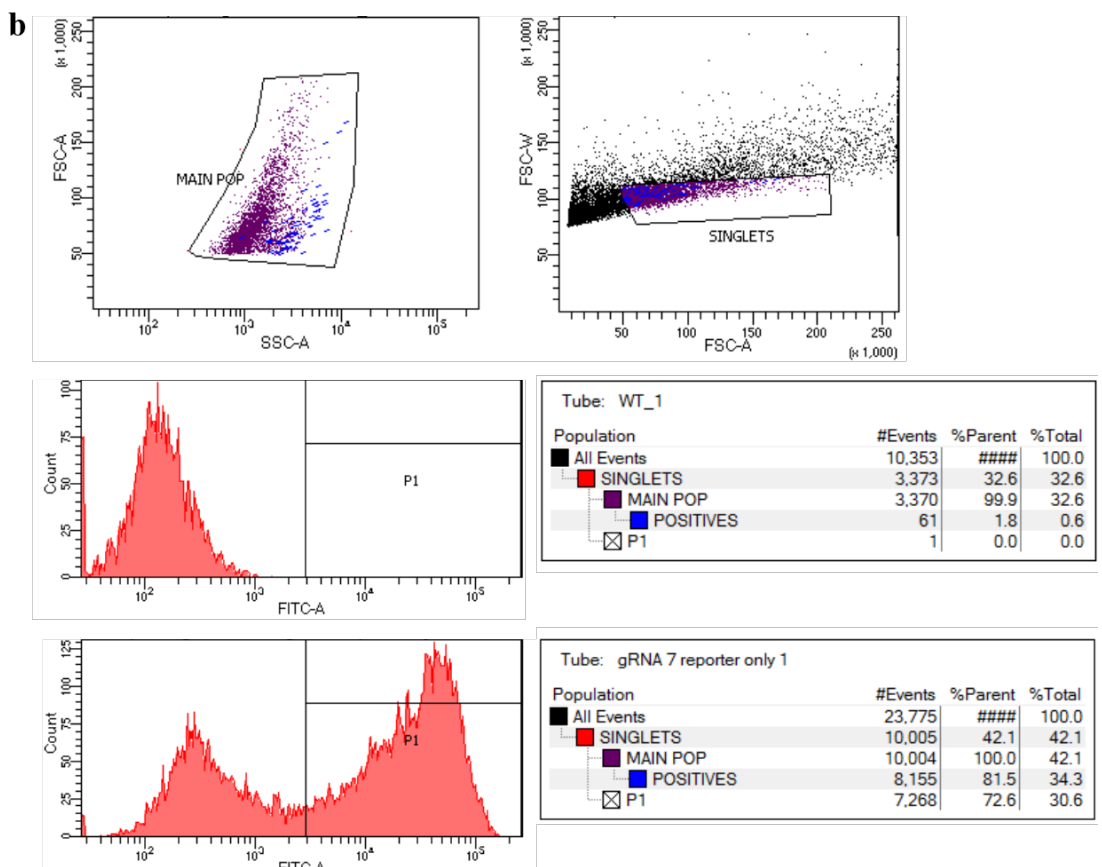

142  
143  
144  
145  
146  
147

**Supplementary Fig. 7. a** Design of the reporter assay includes cloning sites for gRNA binding site, including PAM at the 5'-end of GFP start codon. Successful editing events will result in loss of fluorescence as measured by Flow cytometry. No change in fluorescence refers to the inactivity of gRNA construct. **b** Gating strategy to determine population characteristics of GFP+ cells. P1 is gated based on WT non-fluorescent cells and represents GFP+ cell population.

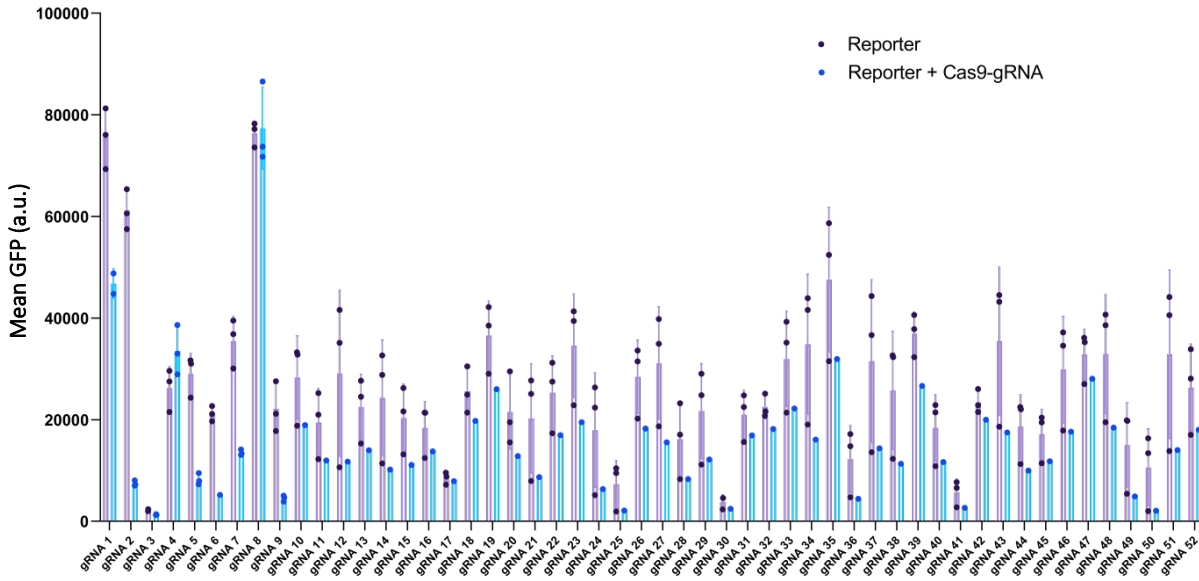

|                     |                     |                   |                     |                   |                   |                    |                     |
|---------------------|---------------------|-------------------|---------------------|-------------------|-------------------|--------------------|---------------------|
| gRNA 1<br>ACTIVE    | gRNA 2<br>ACTIVE    | gRNA 3<br>ACTIVE  | gRNA 4<br>INACTIVE  | gRNA 5<br>ACTIVE  | gRNA 6<br>ACTIVE  | gRNA 7<br>ACTIVE   | gRNA 8<br>INACTIVE  |
| gRNA 9<br>ACTIVE    | gRNA 10<br>ACTIVE   | gRNA 11<br>ACTIVE | gRNA 12<br>ACTIVE   | gRNA 13<br>ACTIVE | gRNA 14<br>ACTIVE | gRNA 15<br>ACTIVE  | gRNA 16<br>ACTIVE   |
| gRNA 17<br>INACTIVE | gRNA 18<br>INACTIVE | gRNA 19<br>ACTIVE | gRNA 20<br>INACTIVE | gRNA 21<br>ACTIVE | gRNA 22<br>ACTIVE | gRNA 23<br>ACTIVE  | gRNA 24<br>ACTIVE   |
| gRNA 25<br>ACTIVE   | gRNA 26<br>ACTIVE   | gRNA 27<br>ACTIVE | gRNA 28<br>INACTIVE | gRNA 29<br>ACTIVE | gRNA 30<br>ACTIVE | gRNA 31<br>ACTIVE  | gRNA 32<br>INACTIVE |
| gRNA33<br>ACTIVE    | gRNA34<br>ACTIVE    | gRNA35<br>ACTIVE  | gRNA36<br>ACTIVE    | gRNA37<br>ACTIVE  | gRNA38<br>ACTIVE  | gRNA39<br>INACTIVE | gRNA40<br>ACTIVE    |
| gRNA41<br>ACTIVE    | gRNA42<br>INACTIVE  | gRNA43<br>ACTIVE  | gRNA44<br>ACTIVE    | gRNA45<br>ACTIVE  | gRNA46<br>ACTIVE  | gRNA47<br>ACTIVE   | gRNA48<br>ACTIVE    |
| gRNA49<br>ACTIVE    | gRNA50<br>ACTIVE    | gRNA51<br>ACTIVE  | gRNA52<br>ACTIVE    |                   |                   |                    |                     |

**Supplementary Fig. 8.** GFP reporter assay to assess gRNA activity. Y-axis represents the arithmetic mean of GFP fluorescence. Reporter only samples are compared to samples with reporter and Cas9-gRNA by a 2-tailed t-test. n = 3 biological replicates. Data are presented as mean values +/-SEM. 9/52 (17.3%) gRNAs showed no editing activity in the reporter assay and were not used for TIDE analysis. Source data are provided as a Source Data file.

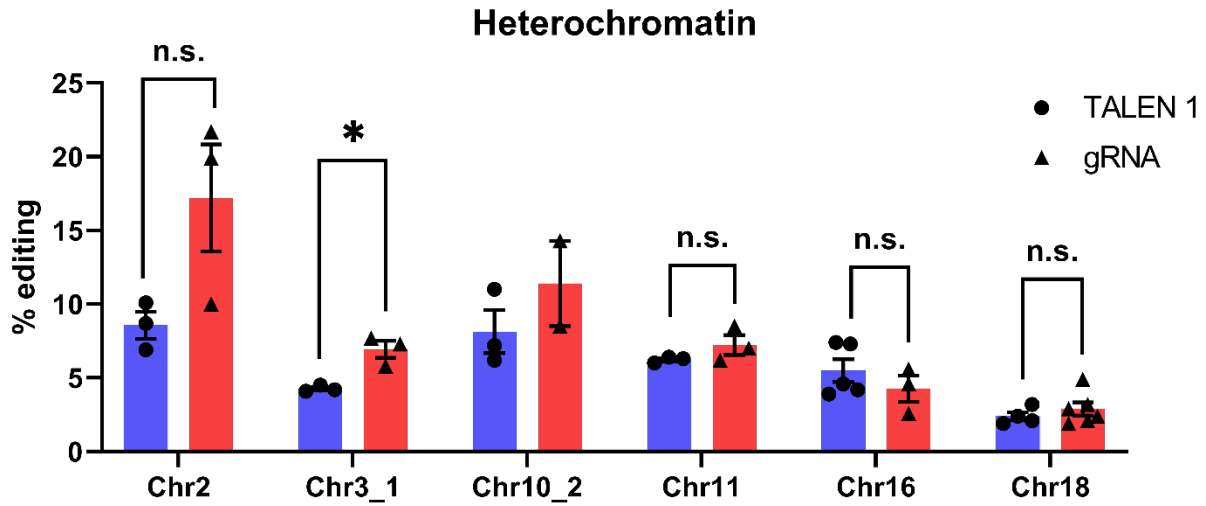

163  
 164 **Supplementary Fig. 9.** Cas9 and TALEN perform similarly in 5/12 loci (41.66%), and CRISPR  
 165 performs better than TALEN at 1/12 loci (0.08%). Data are presented as mean values +/-SEM.  
 166 TALEN samples are compared to Cas9-gRNA samples by a 2-tailed t-test when n>2. Error bars  
 167 represent the standard error of the mean. p < 0.05\*, p < 0.01\*\*, p < 0.001\*\*\*. p values are given  
 168 in the bracket: Chr2 (0.0829), Chr3\_1 (0.9656), Chr10\_2 (0.508), Chr11 (0.217), Chr16 (0.36),  
 169 Chr18 (0.928). Source data are provided as a Source Data file.

170  
 171

172 **Supplementary Table 1.** DNA sequences targeted by TALE and Cas9 variants used in single-  
173 molecule imaging.  
174

| <b>Name</b>     | <b>DNA sequence</b>   |
|-----------------|-----------------------|
| CFTR TALE       | CCAGGAAAAAAAAAGAGGAGT |
| Alu TALE        | CTCGAACTCCTGACCTCAGG  |
| Centromere TALE | CTTTTTGTAGAATCTGCAAG  |
| CFTR gRNA       | AGTATGCAAGAGCTACATAA  |
| Alu gRNA        | CGGGCGGATCACCTGAGGTC  |
| Centromere gRNA | CTTTTTGTAGAATCTGCAAG  |
| TALEN 16        | GCCATTGTGCTATTTGCTCG  |
| gRNA 9          | CTATACCTTTACCGATAGCA  |

175  
176

177 **Supplementary Table 2.** HCT116 chromosome co-ordinates of heterochromatin loci for  
 178 genome editing protein editing efficiency comparison.  
 179

| <b>Chromosome co-ordinates</b> | <b>H3K9me3 fold change</b> | <b>H3K27me3 fold change</b> |
|--------------------------------|----------------------------|-----------------------------|
| chr2:29,682,862-29,683,365     | 3.3248                     |                             |
| chr3:20,900,087-20,900,661     |                            | 4.12723                     |
| chr3:140,209,900-140,210,417   | 3.63982                    |                             |
| chr4:23,453,929-23,454,428     |                            | 4.11628                     |
| chr10:9,506,171-9,506,675      |                            | 3.22333                     |
| chr11:89,501,656-89,502,155    | 3.41277                    |                             |
| chr17:5,926,127-5,926,627      | 2.61907                    |                             |
| chr17:51,406,872-51,407,371    | 4.67405                    |                             |
| chr16:79,820,420-79,820,918    | 6.98685                    |                             |
| chr7:103,199,804-103,200,302   |                            | 4.0682                      |
| chr10:7,745,157-7,745,658      |                            | 2.54284                     |
| chr18:44,552,052-44,552,552    |                            | 9.54758                     |

180  
 181

182 **Supplementary Table 3.** List of gRNAs designed for TIDE analysis using CHOPCHOP and  
 183 Benchling.

184  
 185 **CHOPCHOP**  
 186

| Heterochromatin region       | Target sequence         | Genomic location | Strand | Efficiency |
|------------------------------|-------------------------|------------------|--------|------------|
| chr17:51,406,872-51,407,371  |                         |                  |        |            |
| 1                            | ATATAATGCTGACCGAATTCAGG | chr17:51407051   | -      | 24.34      |
| 2                            | GGACCATATAGGCAGTGAAAAGG | chr17:51407114   | -      | 46.81      |
| chr18:44,552,052-44,552,552  |                         |                  |        |            |
| 3                            | TCCCGCTCGAAAACACAGAAAGG | chr16:79820686   | -      | 66.51      |
| 4                            | TAGCTCATCGATGCCCCCACTGG | chr16:79820461   | -      | 57.08      |
| chr7:103,199,804-103,200,302 |                         |                  |        |            |
| 5                            | GATGCATGGGTTAGGTATCATGG | chr7:103199932   | -      | 41.85      |
| 6                            | ATAGATTCATACTTCAGGACAGG | chr7:103199835   | +      | 52.91      |
| chr10:7,745,157-7,745,658    |                         |                  |        |            |
| 7                            | CTATTGGAATCGCTATTCAATGG | chr10:7745539    | +      | 46.93      |
| 8                            | TACAGATCACTCCTTGCTGTTGG | chr10:7745491    | +      | 53.48      |
| chr16:79,820,420-79,820,918  |                         |                  |        |            |
| 9                            | GGTTATAATAGGTGTGACAATGG | chr18:44552243   | -      | 61.86      |
| 10                           | GCTAGTGATGTTAATAGTAGTGG | chr18:44552359   | -      | 54.08      |
| chr2:29,682,862-29,683,365   |                         |                  |        |            |
|                              | ATATGACTTATGTCCTCCGCTGG | chr2:29683223    | -      | 49.23      |
|                              | TATGACTTATGTCCTCCGCTGGG | chr2:29683222    | -      | 62.67      |
| chr3:20,900,087-20,900,661   |                         |                  |        |            |
|                              | GCTGCTTAATAACATTAGGCAGG | chr3:20900091    | -      | 54.11      |
|                              | GCTAGAAAGATGCTTCAGACAGG | chr3:20900296    | -      | 60.75      |
| chr3:140,209,900-140,210,417 |                         |                  |        |            |
|                              | ACCTTACCACCAGCAAATCCAGG | chr3:140210124   | -      | 50.01      |
|                              | AGGCCGGAGGGGCACCAGACTGG | chr3:140210006   | -      | 40.3       |
| chr4:23,453,929-23,454,428   |                         |                  |        |            |
|                              | AAGTAATCCGAGACAATTAGAGG | chr4:23454140    | -      | 61.38      |
|                              | GTTGTCCACCGAGTCTACCTGGG | chr4:23454351    | +      | 55.84      |
| chr10:9,506,171-9,506,675    |                         |                  |        |            |
|                              | AGTCTATATGACACTATGATGGG | chr10:9506421    | +      | 57.55      |
|                              | AAACAAACGGGCCATTCTGCTGG | chr10:9506562    | +      | 38.34      |
| chr11:89,501,656-89,502,155  |                         |                  |        |            |

|                           |                         |                |   |       |
|---------------------------|-------------------------|----------------|---|-------|
|                           | TAATGGCCATCAATGCAAGCTGG | chr11:89501953 | - | 56.49 |
|                           | TAATGTCTGATAAGAGGCATAGG | chr11:89501793 | + | 55.2  |
| chr17:5,926,127-5,926,627 |                         |                |   |       |
|                           | TATACAGGGCCTTTTAGGGGTGG | chr17:5926281  | - | 58.73 |
|                           | CTTCACGGCTTTTGTCTAAGGG  | chr17:5926362  | - | 43.17 |

187  
188  
189

### Benchling

| Heterochromatin region       | Position  | Strand | Sequence             | PAM | On-Target Score | Off-Target Score |
|------------------------------|-----------|--------|----------------------|-----|-----------------|------------------|
| chr17:51,406,872-51,407,371  | 51406947  | -      | gaaaatggtaatcagcatgg | agg | 74.1            | 56.6             |
|                              | 51406914  | -      | cacaggctcagccttaacaa | agg | 69.1            | 53.7             |
| chr16:79,820,420-79,820,918  | 79820818  | -      | gctggtagtagtgataatgg | tgg | 80.8            | 32.1             |
|                              | 79820560  | -      | aatgatgatagtggacatga | tgg | 72.3            | 50.2             |
| chr7:103,199,804-103,200,302 | 103200178 | -      | caacacttagccaggcacag | tgg | 73.6            | 48.1             |
|                              | 103200065 | +      | agtcttgctctgtgcccag  | tgg | 73              | 29.2             |
| chr10:7,745,157-7,745,658    | 7745185   | -      | tgggtggatcgaacaccag  | agg | 75.9            | 76.7             |
|                              | 7745508   | -      | tcatgaacaagccaacagca | agg | 67.2            | 57               |
| chr18:44,552,052-44,552,552  | 44552345  | -      | tggcatgctactgaaaacag | cgg | 83.9            | 32.1             |
|                              | 44552417  | -      | catctcaaaacacaacaca  | agg | 69.4            | 28               |
| chr2:29,682,862-29,683,365   | 29682945  | -      | tcactaaaacctcttactg  | tgg | 73.6            | 57.8             |
|                              | 29683224  | +      | taagcacattgttaccag   | cgg | 70.5            | 61.3             |
| chr2:78,431,559-78,432,060   | 78431942  | +      | ctataagatgaacgtcacca | agg | 74.3            | 84.6             |
|                              | 78431967  | +      | tatactcaccagactacca  | agg | 68.2            | 74.8             |
| chr3:20,900,087-20,900,661   | 20900115  | +      | aatgttattaagcagccaaa | ggg | 61              | 35.5             |
|                              | 20900302  | -      | gctagaaagatgcttcagac | agg | 60.7            | 68.7             |
| chr3:140,209,900-140,210,417 |           |        |                      |     |                 |                  |

|                                 |           |   |                      |     |      |             |
|---------------------------------|-----------|---|----------------------|-----|------|-------------|
|                                 | 140210058 | - | ggtttttagaaagatcatga | agg | 64.8 | 48.5        |
|                                 | 140210113 | - | tccagggcaaggatgaaatg | agg | 63.2 | 48.8        |
| chr4:23,453,929-<br>23,454,428  |           |   |                      |     |      |             |
|                                 | 23454065  | - | aataataatagtaaagtaca | ggg | 70.4 | 30.5        |
|                                 | 23454315  | - | agagttgcgggagaccaagg | tgg | 68.9 | <u>60.1</u> |
| chr8:7,351,500-<br>7,352,011    |           |   |                      |     |      |             |
|                                 | 7351686   | - | catgatgtaagtcggctgag | ggg | 74.2 | 46.9        |
|                                 | 7351794   | - | agaacaataataaatgtctg | ggg | 66.7 | 29.7        |
| chr10:9,506,171-<br>9,506,675   |           |   |                      |     |      |             |
|                                 | 9506394   | + | gaccaataggcagagcacia | agg | 66.2 | 63.8        |
|                                 | 9506364   | + | acattaacaaaaggggttg  | ggg | 63.1 | 52.9        |
| chr11:89,501,656-<br>89,502,155 |           |   |                      |     |      |             |
|                                 | 89502129  | + | caaggtgggtggatcacctg | agg | 64.6 | 71.7        |
|                                 | 89501992  | - | ccaggattgggagacatgg  | tgg | 64.4 | 16.6        |
| chr13:56,045,589-<br>56,046,141 |           |   |                      |     |      |             |
|                                 | 56045841  | - | ggcaaggtgtcatgcaaag  | agg | 69.5 | 67          |
|                                 | 56045787  | + | aagaagacacttgatcaaag | tgg | 68   | 57.5        |
| chr17:5,926,127-<br>5,926,627   |           |   |                      |     |      |             |
|                                 | 5926552   | + | tgctcctgcaaagatcagtg | tgg | 71.3 | 37.9        |
|                                 | 5926330   | - | ggggaaactgaggctcaaag | agg | 69.4 | 17.4        |

190  
191  
192

#### Euchromatin gRNAs

| Gene  | Target site          | PAM |
|-------|----------------------|-----|
| EMX1  | GAGTCCGAGCAGAAGAAGAA | GGG |
| TPCN2 | GTGGGTGAGTGAGTGCGTGC | GGG |
| NRG2  | GGGCAGTTTGCTCCTGGCAC | AGG |
| DNMT1 | GATTCCTGGTGCCAGAAACA | GGG |

193



194  
195

**Supplementary Table 4.** List of TALEN pairs designed for TIDE analysis using CHOPCHOP and SAPTA.

| #  | Name             | TALE Forward Binding     | TALE Reverse Binding    |
|----|------------------|--------------------------|-------------------------|
| 1  | chr2-CHOPCHOP    | tgcaataacttgatcattg      | taccagcggaggacata       |
| 2  | chr2-SAPTA       | tagtgactaccttgacgtag     | cagccccacatcttgct       |
| 3  | chr3_1-CHOPCHOP  | tagtgactgatctgggaa       | aaagctcggctagagcta      |
| 4  | chr3_1-SAPTA     | acacaacctataattgat       | gtaccattgtaagaacctttct  |
| 5  | chr3_2-CHOPCHOP  | taagtcatacgtccctaa       | tatctgtggagtaaaaca      |
| 6  | chr3_2-SAPTA     | ctactttgccttcatgat       | gtgtcttagcaaggcag       |
| 7  | chr4-CHOPCHOP    | ttagcctgcgtgagtagc       | attgtctcggattactta      |
| 8  | chr4-SAPTA       | ccaccaagccctgtac         | atttctagcaaccagat       |
| 9  | chr7-CHOPCHOP    | cggccatgatacctaa         | taagacatgaagaaatg       |
| 10 | chr7-SAPTA       | cagccccactgtagctgggac    | ccaacacttagccaggcacag   |
| 11 | chr10_1-CHOPCHOP | cttaaagcgaactgtac        | cctactgaaccaagttc       |
| 12 | chr10_1-SAPTA    | cctcccagaccatctgct       | ctttcattttgctggacag     |
| 13 | chr10_2-CHOPCHOP | tgaaggtagttgatac         | taaaaaaacactatatca      |
| 14 | chr10_2-SAPTA    | gaaccctaattgaacc         | gtacattgacacatcattat    |
| 15 | chr11-CHOPCHOP   | tcacagcagccttgtgc        | cattaacataccttgcca      |
| 16 | chr11-SAPTA      | ttgccaccaaatagttgat      | gcctcttttaggattcag      |
| 17 | chr16-CHOPCHOP   | tactattgctaccatca        | gtggtagtaacgggtgat      |
| 18 | chr16-SAPTA      | actaccaccatcaccac        | tgctcactggcaccattgtcac  |
| 19 | chr17_1-CHOPCHOP | tcccacatgtaataaaa        | ccgtgaaggtccttccaa      |
| 20 | chr17_1-SAPTA    | gtggcttgcacctacatggctgag | ctgccagacactgcgttgattgt |
| 21 | chr17_2-CHOPCHOP | aatggaatgctgttctc        | ataatgtgaccgaatt        |
| 22 | chr17_2-SAPTA    | ttgccttatattcctttg       | ggaccatataggcag         |
| 23 | chr18-CHOPCHOP   | gtgcgggggtgtttcc         | gctcccacagcgacaat       |
| 24 | chr18-SAPTA      | gcagccgctgtttcagtag      | ctagcccctcatagctcatcgat |
| 25 | EMX1_CHOPCHOP    | tccgaggaaccgctccgg       | tcaccagcgcggccga        |
| 26 | EMX1_SAPTA       | ggtccagaaccggag          | caggccttctctccagcttct   |
| 27 | TPCN2_CHOPCHOP   | tggctaccgcgctgctc        | cctgaccgagagtgtcga      |
| 28 | TPCN2_SAPTA      | ttggcgtctccaggccacag     | ctgcctccaacccactgcag    |
| 29 | NRG2_CHOPCHOP    | tcggccaggggtaactg        | cgacacggcgtgcgccga      |
| 30 | NRG2_SAPTA       | ttgctcctggcacag          | gtgccactgcactgaa        |
| 31 | DNMT1_CHOPCHOP   | tcgatctcttacctcgat       | tcataggtcgagtcggaa      |
| 32 | DNMT1_SAPTA      | tagcagcttctctcctttat     | tcccagagtgactttcctttat  |

196  
197

**Supplementary Table 5.** List of genotyping primers for TIDE analysis.

| <b>Genotyping primers</b> | <b>Sequence</b>         | <b>TIDE analysis</b> |
|---------------------------|-------------------------|----------------------|
| chr2-HCT116-F             | GCGAATCTCTGTTTAGATCACC  | gRNA and TALENs      |
| chr2-HCT116-R             | GGTCTGTCTCAGCTTTCAAC    | gRNA and TALENs      |
| chr3_1-HCT116-F           | GCAGGTCATTTGTGTCACAAG   | gRNA and TALENs      |
| chr3_1-HCT116-R           | GTGACCCTTTCTTAGGATGTTC  | gRNA and TALENs      |
| chr3_2-HCT116-F           | CAGCTGTGATGTCTAGTACC    | gRNA and TALENs      |
| chr3_2-HCT116-R           | GACAGCGTCTCACTCCAG      | gRNA and TALENs      |
| chr4-HCT116-F             | GCCTTCTAATTTTGATAGGATGC | gRNA and TALENs      |
| chr4-HCT116-R             | GATGCTGTTATCTGCAAAGG    | gRNA and TALENs      |
| chr7-HCT116-F             | GTGGTGATGGTAGGATTTGAAC  | gRNA and TALENs      |
| chr7-HCT116-R             | GATTACAAATCATGCTCACTTTC | gRNA and TALENs      |
| chr10_1-HCT116-F          | ACATTCAAGCACATCCATCTGC  | gRNA and TALENs      |
| chr10_1-HCT116-R          | CTGCCTGCTATCTTCCGCTT    | gRNA and TALENs      |
| chr10_2-HCT116-F          | AGCAAACAAGAACTAGAGG     | gRNA and TALENs      |
| chr10_2-HCT116-R          | TTTCCTCACATCTGCTGTG     | gRNA and TALENs      |
| chr11-HCT116-F            | CTCACTCCTGCAAGGAAGTAG   | gRNA and TALENs      |
| chr11-HCT116-R            | CTGCAGGAAGATCTAGAGCTAC  | gRNA and TALENs      |
| chr16-HCT116-F            | TCAAGGGCAGTGAATGAGAG    | gRNA and TALENs      |
| chr16-HCT116-R            | AGTCCACGAAAATAGCAGCC    | gRNA and TALENs      |
| chr17_1-HCT116-F          | CGATGTTAAAGGAAATAGCTC   | gRNA and TALENs      |
| chr17_1-HCT116-R          | TGAGAGTTTCAGGATCAAGG    | gRNA and TALENs      |
| chr17_2-HCT116-F          | ATAGCAGAAGCAGCTGGAAG    | gRNA and TALENs      |
| chr17_2-HCT116-R          | GTCAACGTCCTGTCTTGGATC   | gRNA and TALENs      |
| chr18-HCT116-F            | AGAATTACCCTCCGTGTTGTG   | gRNA and TALENs      |
| chr18-HCT116-R            | CCGTCTCTTCTAAAAAGACG    | gRNA and TALENs      |
| EMX1-GS-F                 | CTAGGATGCACAGCAGCTC     | gRNA and SAPTA TALEN |
| EMX1-GS-R                 | TGGAGGTAGAGACCAGGGTC    | gRNA and SAPTA TALEN |
| TPCN2-GS-F                | CTCAGTGCTATCCACAGGTTT   | gRNA and SAPTA TALEN |
| TPCN2-GS-R                | GAGCTCCCTGCTGTACAAAG    | gRNA and SAPTA TALEN |
| DNMT1-GS-F                | CAGAATGCACAAAGTACTGC    | gRNA and SAPTA TALEN |
| DNMT1-GS-R                | AGGTGTCTCCATCTGAG       | gRNA and SAPTA TALEN |
| EMX1-TC-F                 | TGTGCATGTGCCTGGCTG      | CHOPCHOP TALEN       |
| EMX1-TC-R                 | AGAGAATTGGGCAGGCTGTG    | CHOPCHOP TALEN       |
| TPCN2-TC-F                | GGCAATGGAGCTTTGAGCAG    | CHOPCHOP TALEN       |
| TPCN2-TC-R                | CTCTCCTCACAGCAGCACTG    | CHOPCHOP TALEN       |
| DNMT1-TC-F                | GTCATAACTCTCCACCTGCTC   | CHOPCHOP TALEN       |
| DNMT1-TC-R                | CAGCTACTTGGGAGGCTATG    | CHOPCHOP TALEN       |
