# Supplementary material for: TALEN outperforms Cas9 in editing heterochromatin target sites
Source: PubMed Central journal article supplement (PMC7840734; doi:10.1038/s41467-020-20672-5), 2021-01-27
Supplement: 41467_2020_20672_MOESM3_ESM.pdf [file 41467_2020_20672_MOESM3_ESM.pdf]

## **Description of Additional Supplementary Files**

File Name: Supplementary Movie 1

Description: CFTR TALE (red dots) fused with JF549 dye moving in a live HeLa cell
